# Supplementary material for: Novel Cu(Zn)–Ge–P compounds as advanced anode materials for Li-ion batteries
Source: Royal Society of Chemistry journal article supplement (doi:10.1039/d0ee03553j), 2021-01-01
Supplement: d0ee03553j1.pdf [file d0ee03553j1.pdf]

## Supporting Information

### Novel Cu(Zn)-Ge-P compounds as advanced anode materials for Li-ion batteries

Wenwu Li,<sup>\*a,b</sup> Pengfei Shen,<sup>b</sup> Lufeng Yang,<sup>c</sup> Anjie Chen,<sup>d</sup> Jeng-Han Wang,<sup>d</sup> Yunyong Li<sup>b</sup>, Hailong Chen,<sup>c</sup> and Meilin Liu<sup>\*a</sup>

- a. School of Materials Science & Engineering, Georgia Institute of Technology, Atlanta, GA, 30332, USA
- b. School of Materials and Energy, Guangdong University of Technology, Guangzhou 510006, PR China.
- c. The Woodruff school of Mechanical Engineering, Georgia Institute of Technology, 771 Ferst Drive, Atlanta, GA, 30332, USA
- d. Department of Chemistry, National Taiwan Normal University, Taipei, 11677, Taiwan.

**Table S1.** Key processing and refinement parameters of  $\text{CuGe}_2\text{P}_3$  sample.

| Compound               | $\text{CuGe}_2\text{P}_3$ |
|------------------------|---------------------------|
| Crystal System         | Cubic                     |
| Space Group            | F-43m                     |
| Point Group            | CF6                       |
| a Å                    | 5.354425                  |
| V Å <sup>3</sup>       | 153.511                   |
| 2 $\theta$ -interval ° | 5-130                     |
| Z                      | 1                         |
| Rwp%                   | 1.64                      |
| Rp%                    | 1.28                      |
| <sup>2</sup>           | 1.594                     |

**Table S2.** Fractional atomic coordinates and isotropic displacement parameters (Å<sup>2</sup>) of  $\text{CuGe}_2\text{P}_3$ .

|    | x    | y    | z    | U <sub>iso</sub> | Occ   |
|----|------|------|------|------------------|-------|
| Cu | 0    | 0    | 0    | 0.25128          | 0.333 |
| Ge | 0    | 0    | 0    | 0.25128          | 0.667 |
| P  | 0.25 | 0.25 | 0.25 | 0.00689          | 1     |

**Table S3.** Synchrotron radiation angle information of the  $\text{CuGe}_2\text{P}_3$ .

| $\text{CuGe}_2\text{P}_3$ Powder |        |       |        |        |        |         |         |         |         |
|----------------------------------|--------|-------|--------|--------|--------|---------|---------|---------|---------|
| 2 $\theta$                       | 4.435° | 5.03° | 7.258° | 7.616° | 8.506° | 10.266° | 11.187° | 12.576° | 13.344° |
| Relative intensity               | 100    | 10.46 | 54.3   | 6.97   | 29.17  | 8.07    | 11.82   | 12.25   | 7.24    |

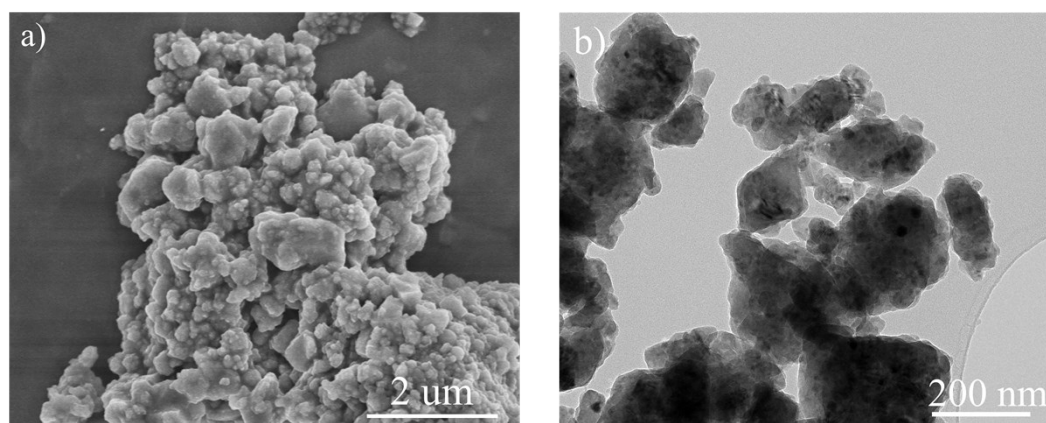**Fig. S1.** Morphology characterizations of  $\text{CuGe}_2\text{P}_3$  compound at low magnification: a) The FESEM image; b) the TEM image.

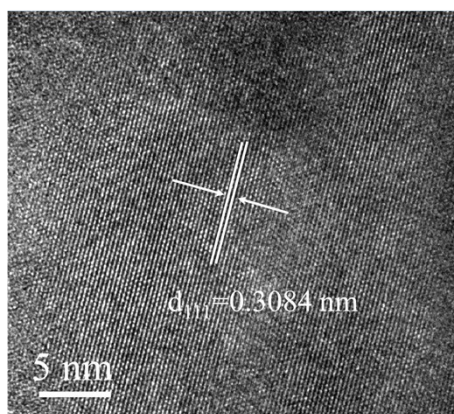

**Fig. S2.** HRTEM image of as-synthesized cubic  $\text{CuGe}_2\text{P}_3$ .

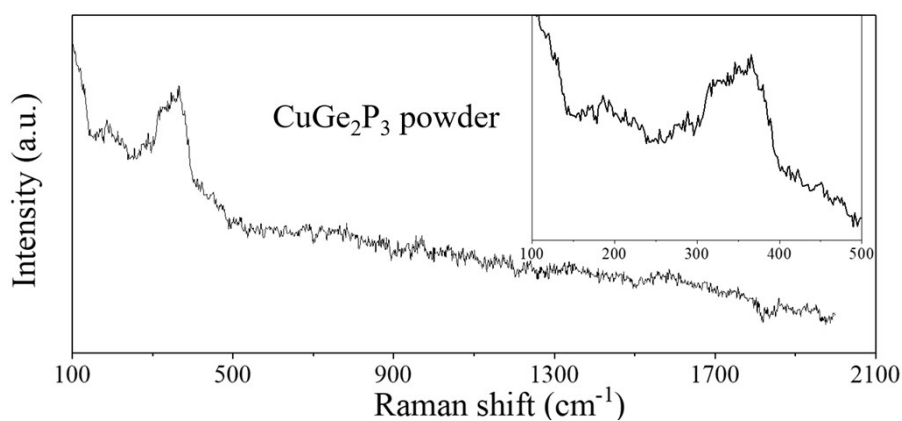

**Fig. S3.** Raman spectroscopy of the cation-disordered  $\text{CuGe}_2\text{P}_3$  compound.

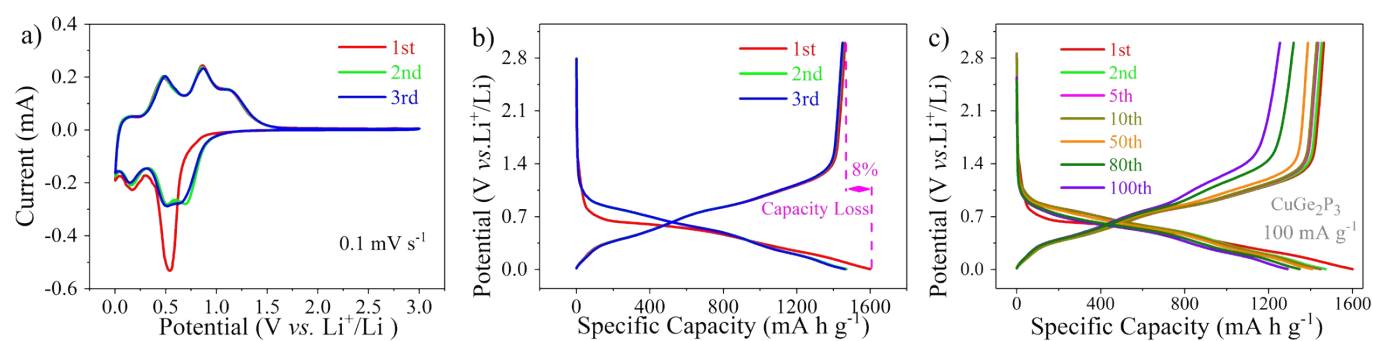

**Fig. S4.** a) Initial three CV curves and b) initial three discharge-charge profiles of the cation-disordered  $\text{CuGe}_2\text{P}_3$  compound; c) voltage profiles of different cycling conditions of  $\text{CuGe}_2\text{P}_3$  compound at  $100 \text{ mA h g}^{-1}$ .

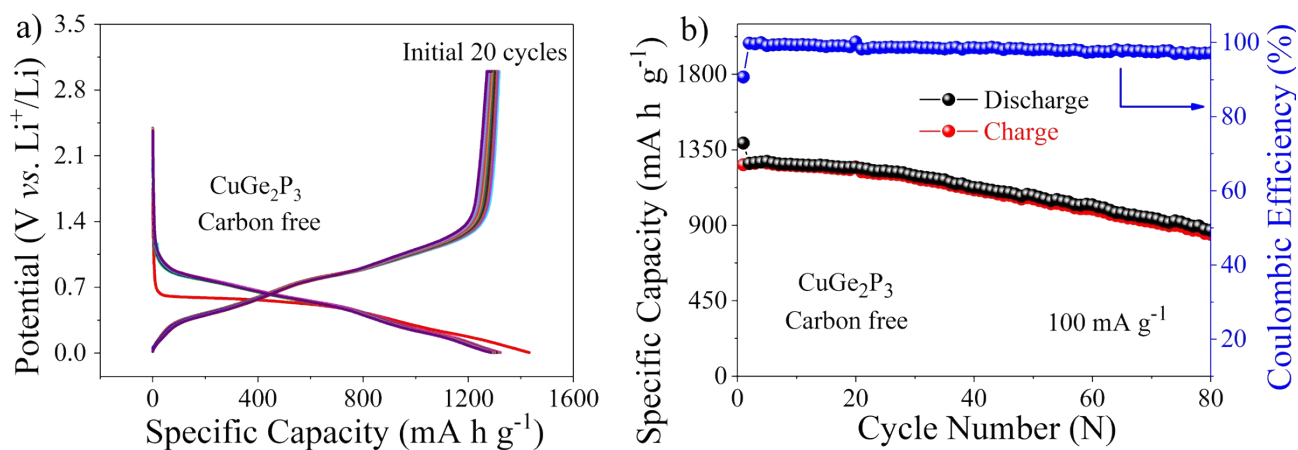

Fig. S5. Typical discharge-charge curves and cycle performance of the cation-disordered CuGe<sub>2</sub>P<sub>3</sub> compound without any conductive agents.

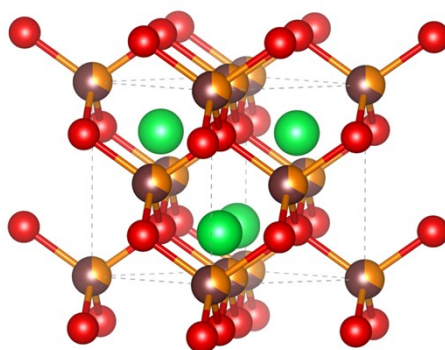

Fig. S6. The crystal structure of Li<sub>3</sub>CuGe<sub>2</sub>P<sub>3</sub>, which derived from the Li-insertion voids within the crystal structure of the cation-disordered CuGe<sub>2</sub>P<sub>3</sub> compound.

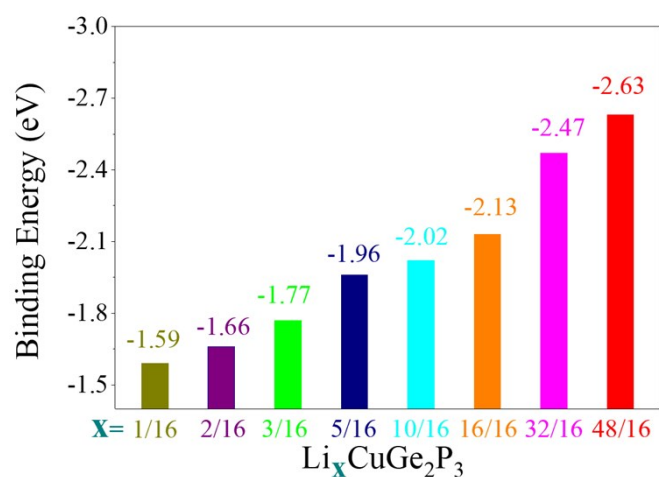

Fig. S7. Binding energies of cation-disordered CuGe<sub>2</sub>P<sub>3</sub> with various Li atom number inserted in the voids by first-principles calculations.

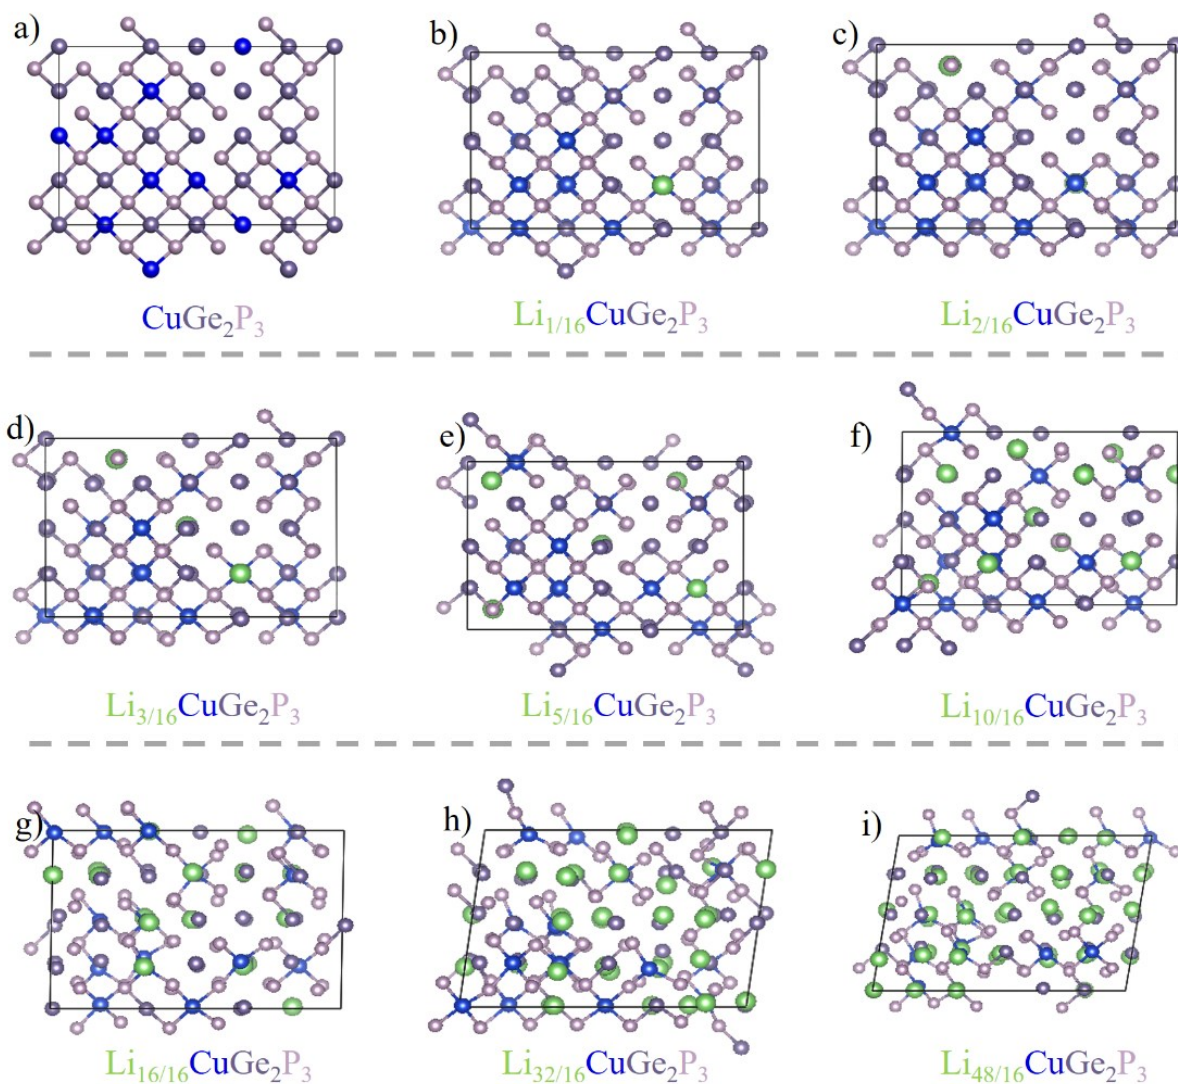

Fig. S8. The corresponding supercell models in Fig. S7.

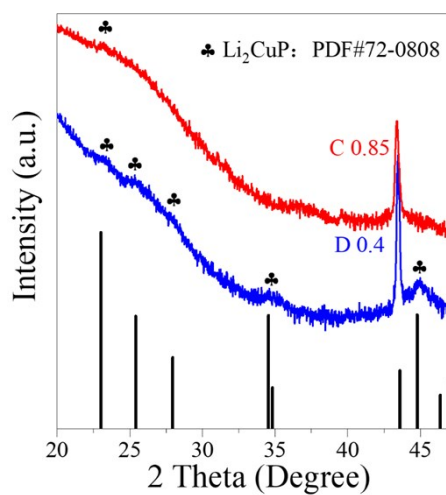

Fig. S9. The enlarged XRD patterns at the state of discharging to 0.4 V and charging to 0.85 V.

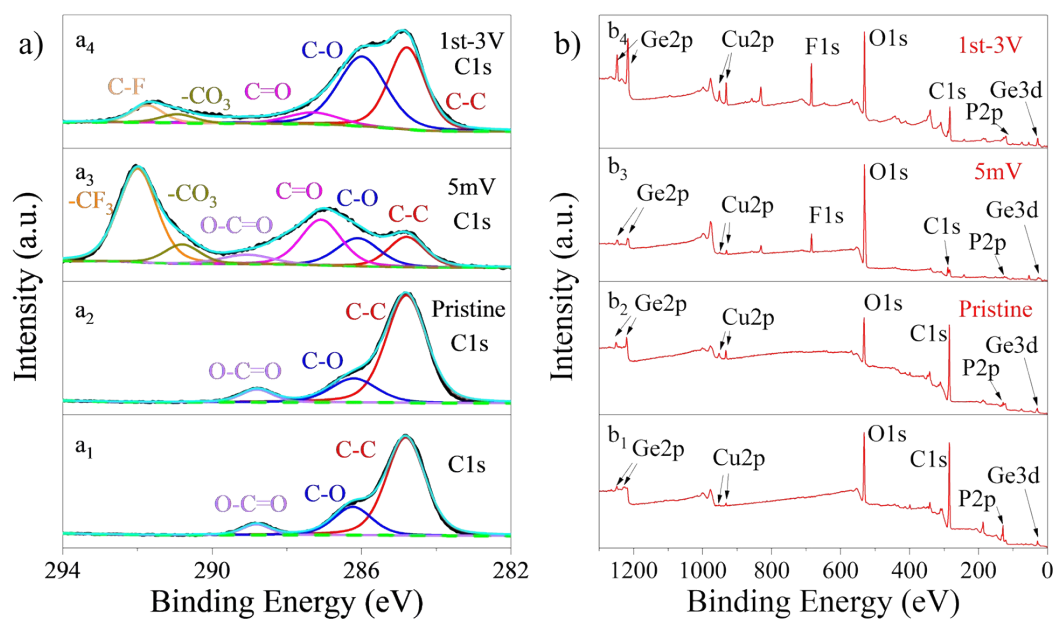

**Fig. S10.** High-resolution XPS spectra of the cation-disordered  $\text{CuGe}_2\text{P}_3$  compound electrodes after initial cycling, the discharge state of 5 mV, pristine  $\text{CuGe}_2\text{P}_3$  sample and raw materials of Ge, P and Cu.

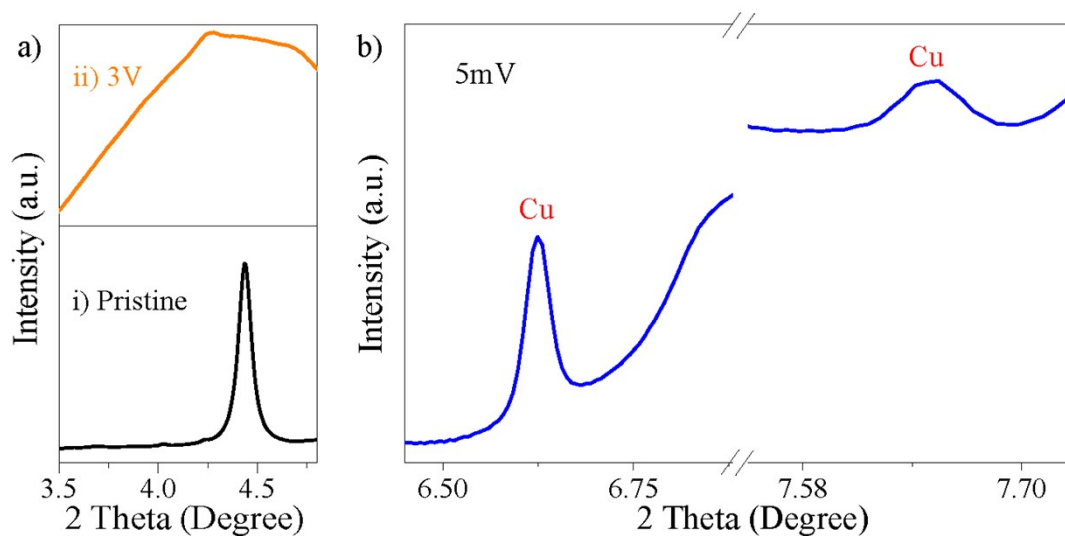

**Fig. S11.** The ex-situ high-resolution synchrotron X-ray diffraction patterns of  $\text{CuGe}_2\text{P}_3$  anodes at different potentials.

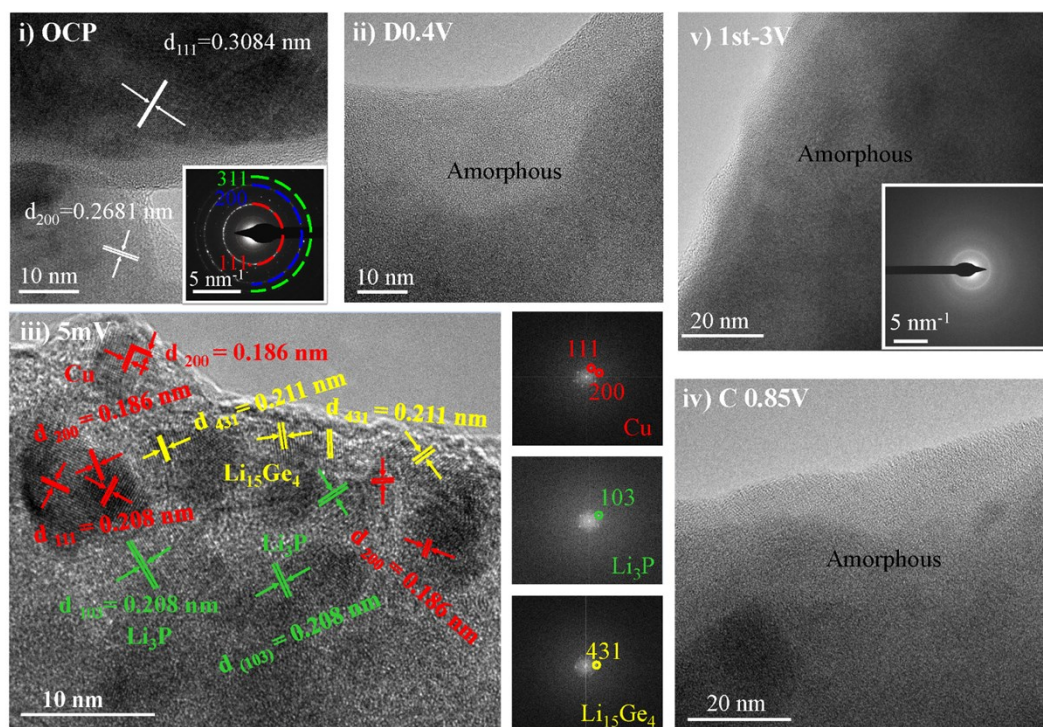

Fig. S12. Ex-situ HRTEM images of the cation-disordered  $\text{CuGe}_2\text{P}_3$  compound anodes at different potentials.

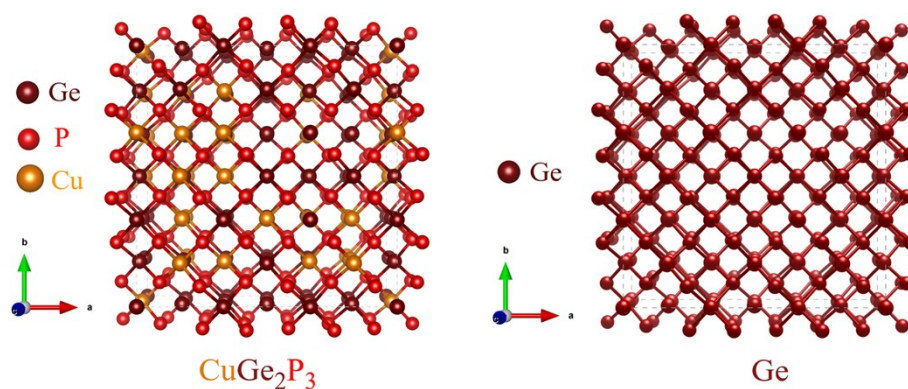

Fig. S13. Simulation models utilized for first-principles calculations of the cation-disordered  $\text{CuGe}_2\text{P}_3$  and Ge.

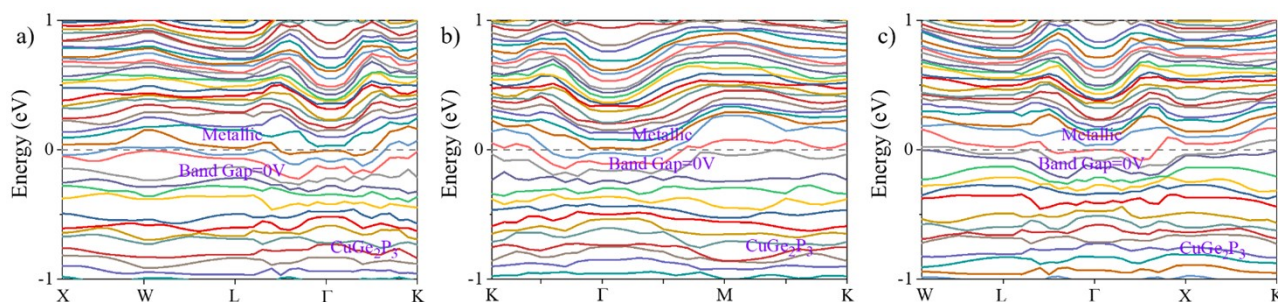

Fig. S14. Band structures of the cation-disordered  $\text{CuGe}_2\text{P}_3$ .

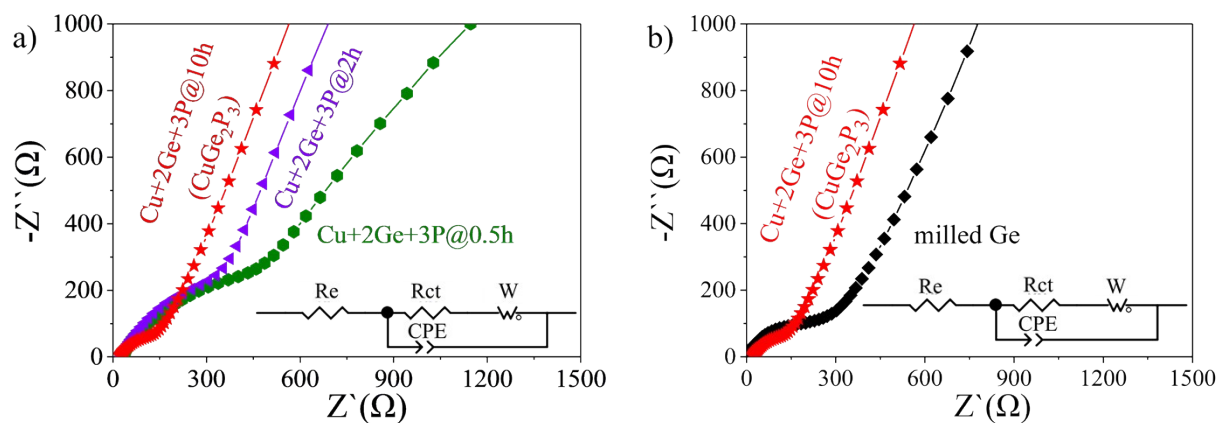

**Fig. S15.** Electrochemical impedance spectroscopy of the cell with a) ball milled Cu+2Ge+3P samples and, b) ball milled Ge powder.

**Table S4.** The tested electronic conductivity of the CuGe<sub>2</sub>P<sub>3</sub>-based electrode (CuGe<sub>2</sub>P<sub>3</sub>: carbon black: binder = 7: 2: 1), CuGe<sub>2</sub>P<sub>3</sub> powder, Ge powder, the mixed Cu+2Ge+3P powder and red P powder under the mild pressure and room temperature.

| Materials                                  | Conductivity (S m <sup>-1</sup> ) |
|--------------------------------------------|-----------------------------------|
| CuGe <sub>2</sub> P <sub>3</sub> electrode | 331                               |
| CuGe <sub>2</sub> P <sub>3</sub>           | 68                                |
| Ge                                         | 0.089                             |
| mixed Cu+2Ge+3P                            | 0.03                              |
| red P                                      | less than 10 <sup>-5</sup>        |

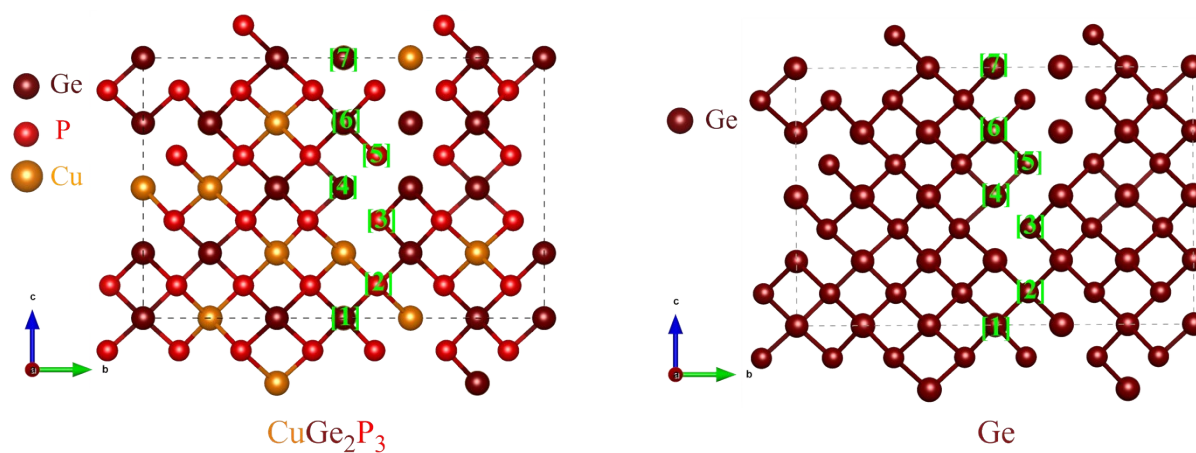

**Fig. S16.** Typical Li-ion migration paths of the cation-disordered CuGe<sub>2</sub>P<sub>3</sub> and Ge.



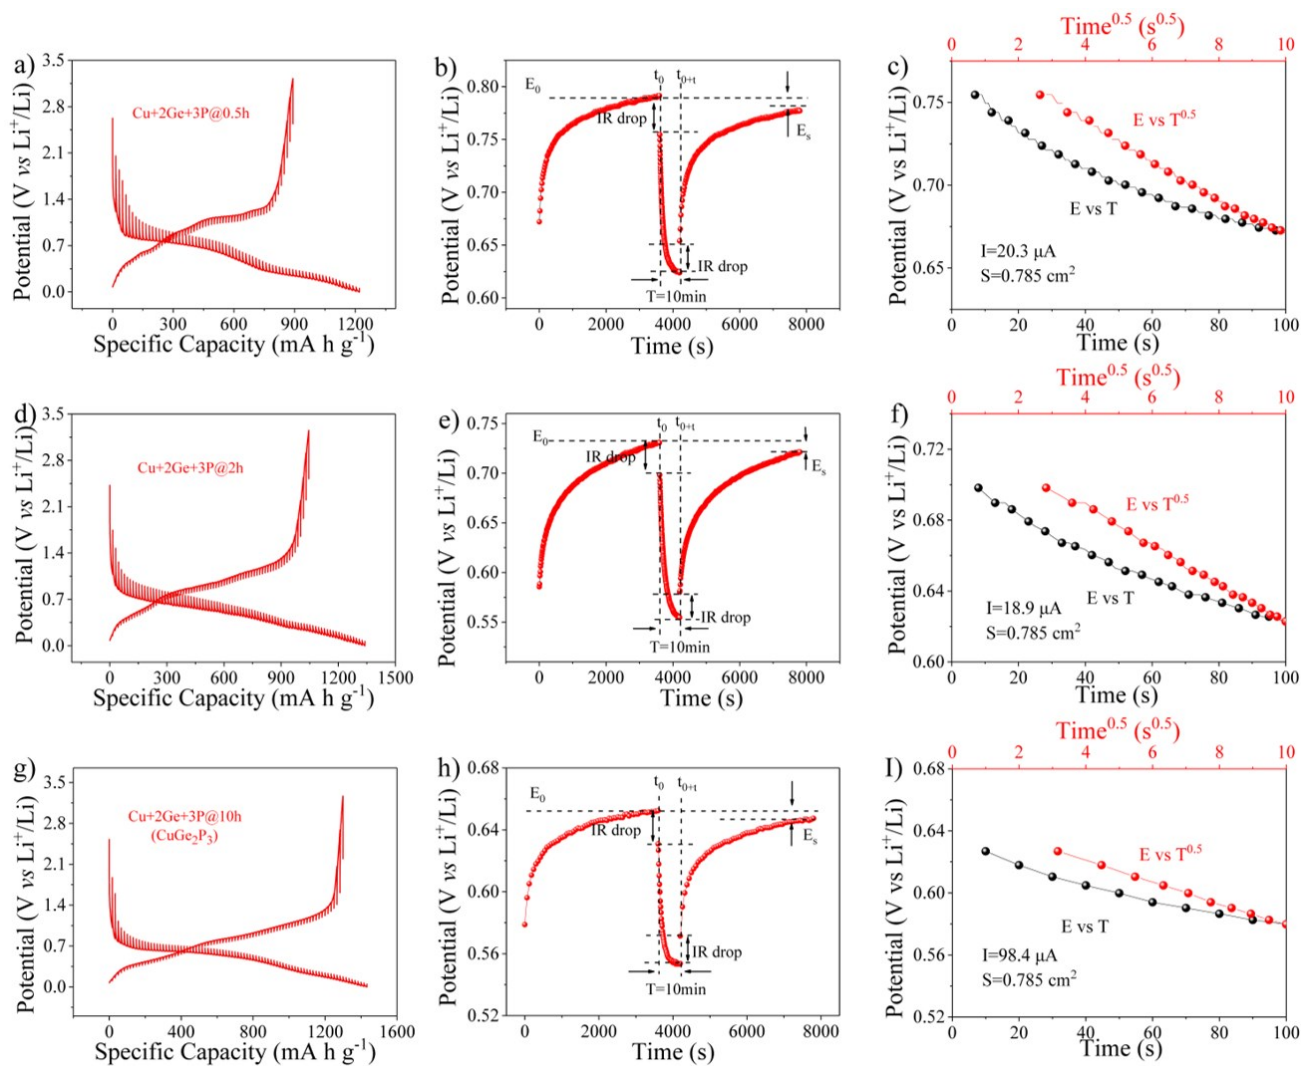

**Fig. S17.** a), d) and g) Galvanostatic intermittent titration technique (GITT) profiles during first-cycle discharge-charge of LIBs utilizing the ball milled Cu+2Ge+3P samples; b), e) and h) typical schemes for single-step of GITT experiments of LIBs utilizing the ball milled Cu+2Ge+3P samples; c), f) and i)  $dE/dt^{(1/2)}$  curves from b), e) and h) of LIBs the ball milled Cu+2Ge+3P samples.

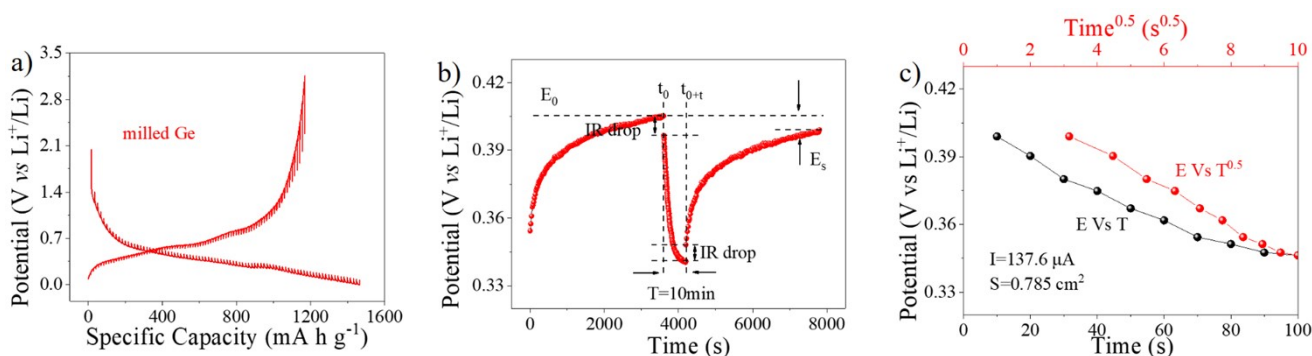

**Fig. S18.** a) Galvanostatic intermittent titration technique (GITT) profiles during pristine discharge and charge of LIBs utilizing milled Ge as electrodes; b) the typical schemes for single-step of GITT experiments of LIBs utilizing milled Ge as electrodes; c)  $dE/dt^{(1/2)}$  curves from b) of LIBs utilizing milled Ge as electrodes.

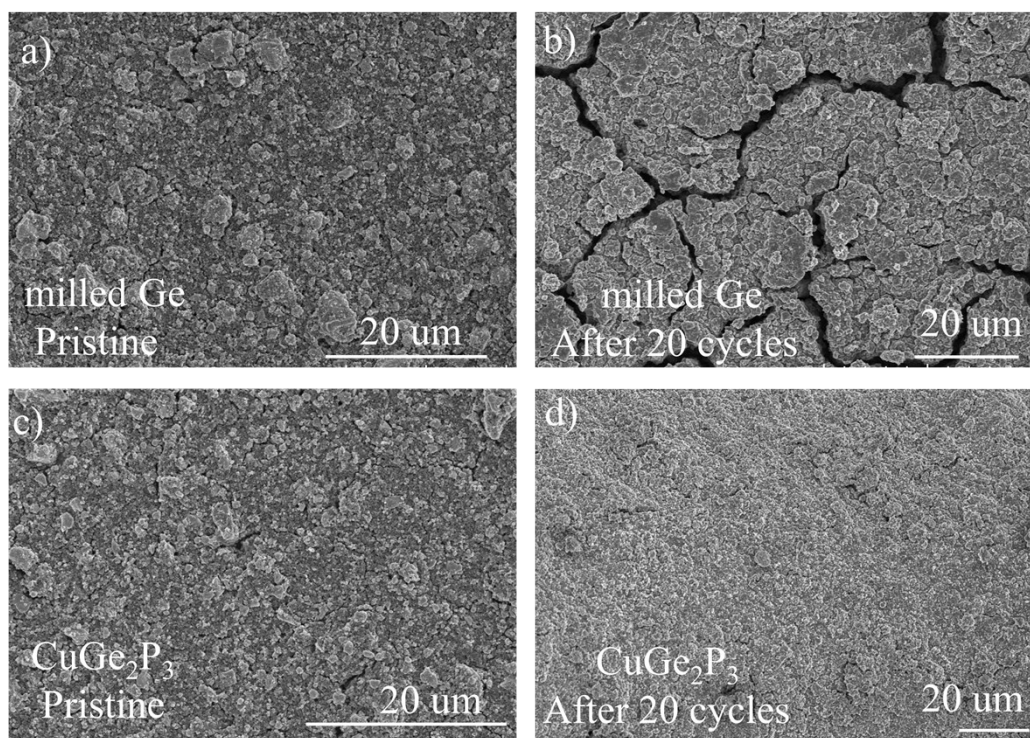

**Fig. S19.** SEM images of the cation-disordered CuGe<sub>2</sub>P<sub>3</sub> compound and milled Ge electrodes: a) milled Ge electrodes before cycling, b) milled Ge electrodes after 20 cycles at 100 mA g<sup>-1</sup>, c) cation-disordered CuGe<sub>2</sub>P<sub>3</sub> compound electrodes before cycling, d) the cation-disordered CuGe<sub>2</sub>P<sub>3</sub> compound electrodes after 20 cycles at 100 mA g<sup>-1</sup>.

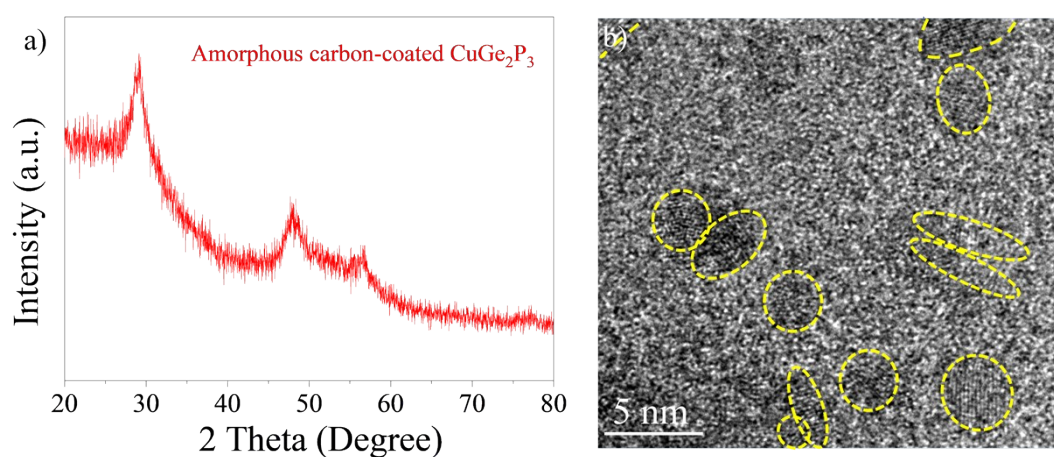

**Fig. S20.** a) XRD pattern and b) HRTEM image of the amorphous carbon-coated the cation-disordered CuGe<sub>2</sub>P<sub>3</sub> compound. The broadened XRD diffraction peaks and the low intensity, along with the disappearance of graphite indicate that the particle size of the as-synthesized CuGe<sub>2</sub>P<sub>3</sub> was significantly decreased and embedded into the amorphous carbon.

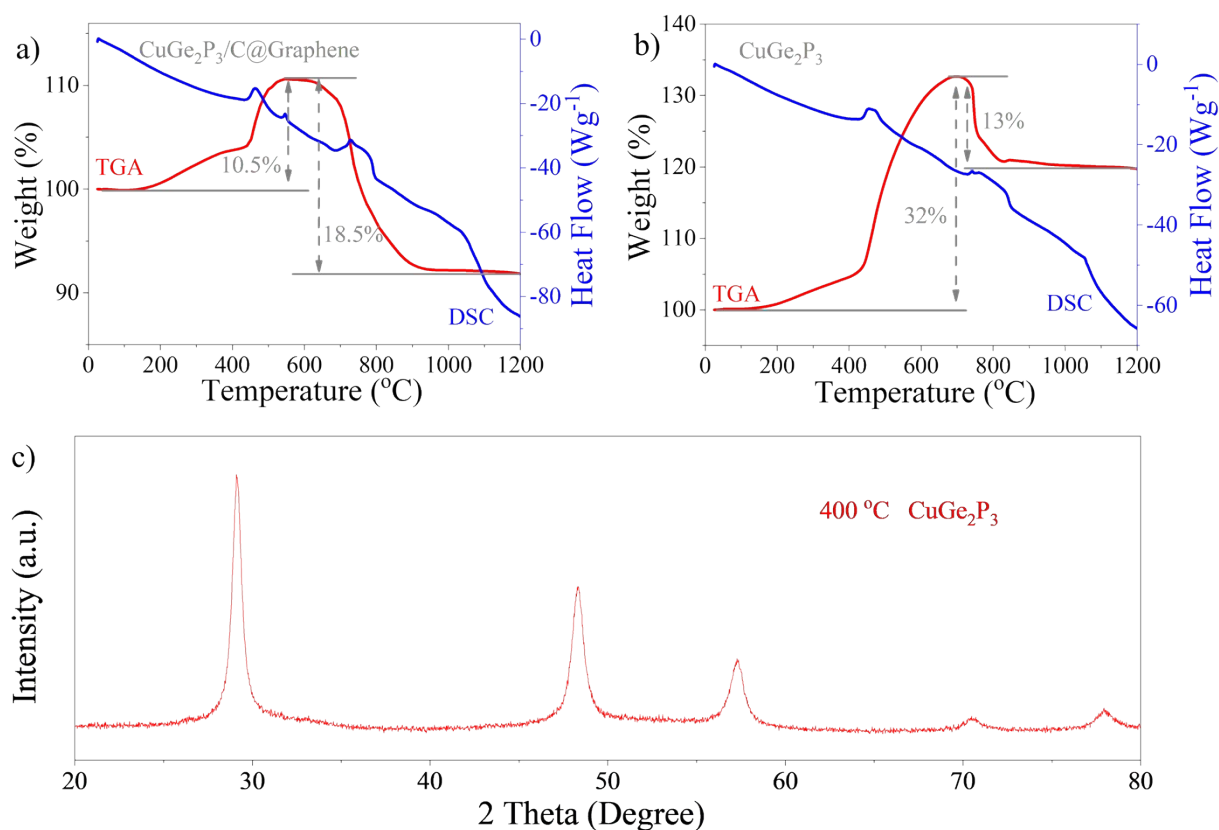

**Fig. S21.** a-b) TGA curves of CuGe<sub>2</sub>P<sub>3</sub>/C@Graphene and b) the CuGe<sub>2</sub>P<sub>3</sub> compound; c) XRD pattern of CuGe<sub>2</sub>P<sub>3</sub> under 400°C in air for 3h.

Note that the carbon content is calculated as follows:

Carbon content in the composite is  $x$  and CuGe<sub>2</sub>P<sub>3</sub> is  $y$ .

$$x + y = 1 \text{ (Equation 1);}$$

$$1.19y = 0.92 \text{ (Equation 2).}$$

According to the above equations, the carbon content ( $x$ ) can be obtained to be 22.69 %, which is close to the feed ratio of the two components.

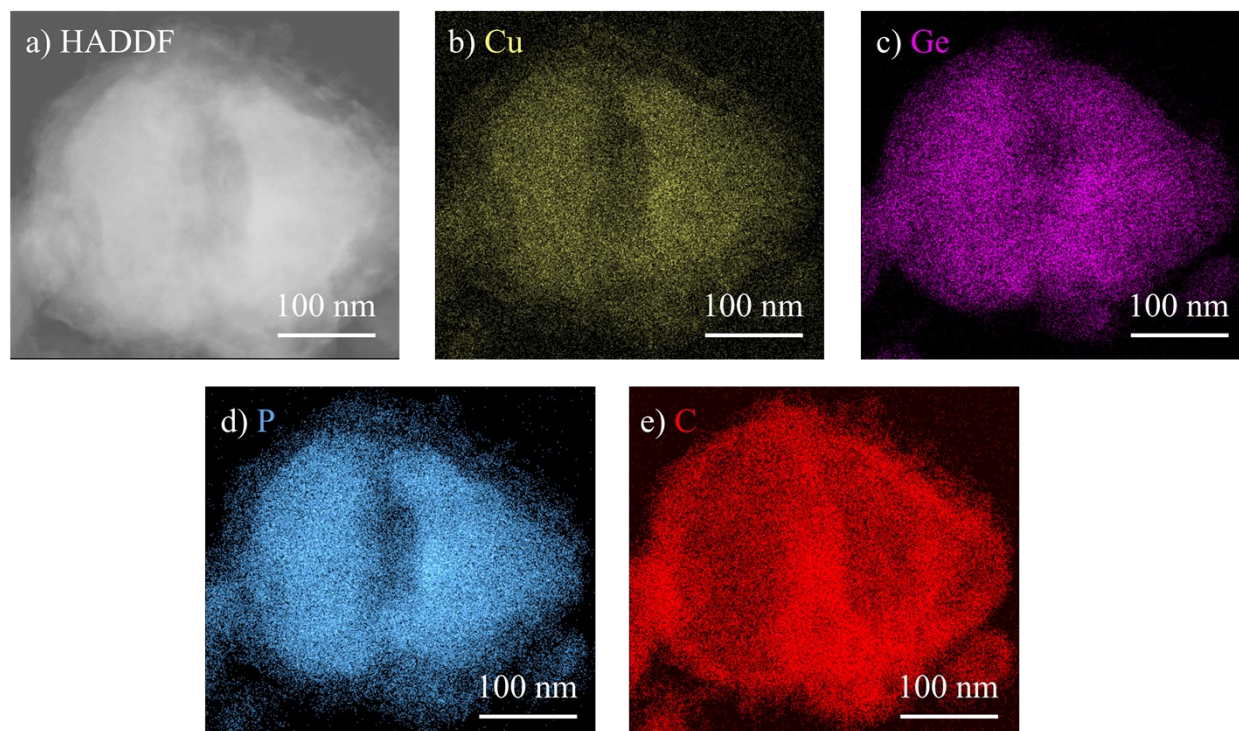

Fig. S22. Low magnification TEM image and elemental mappings of CuGe<sub>2</sub>P<sub>3</sub>/C@Graphene.

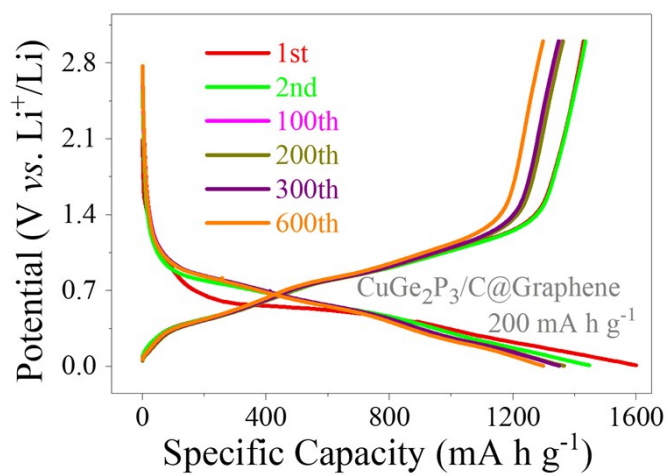

Fig. S23. Voltage profiles of different cycling conditions of CuGe<sub>2</sub>P<sub>3</sub>/C@Graphene at 200 mA h g<sup>-1</sup>.

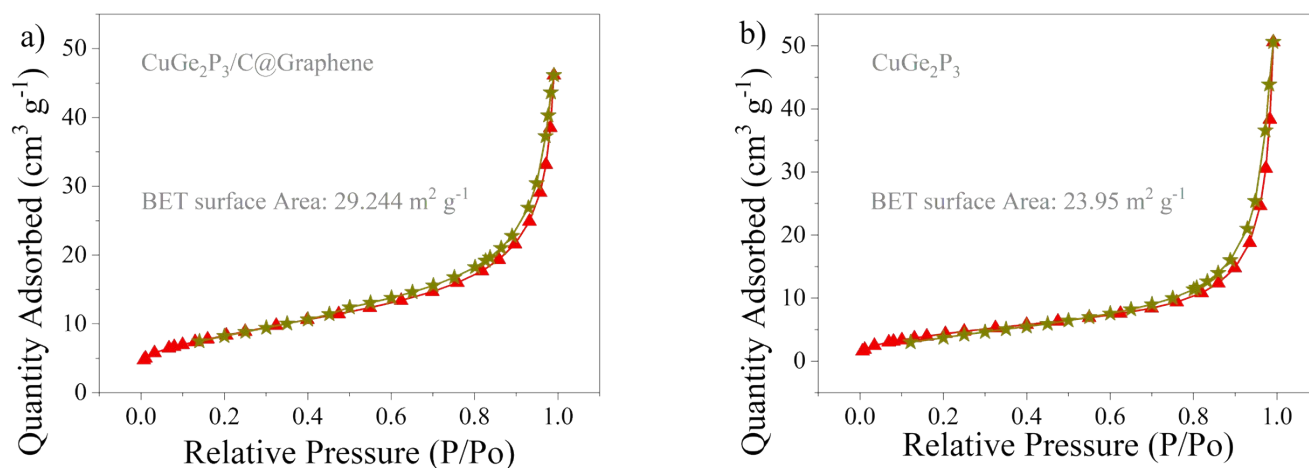

Fig. S24. BET curves of a) CuGe<sub>2</sub>P<sub>3</sub>/C@Graphene and b) Cation-disordered CuGe<sub>2</sub>P<sub>3</sub> compound.

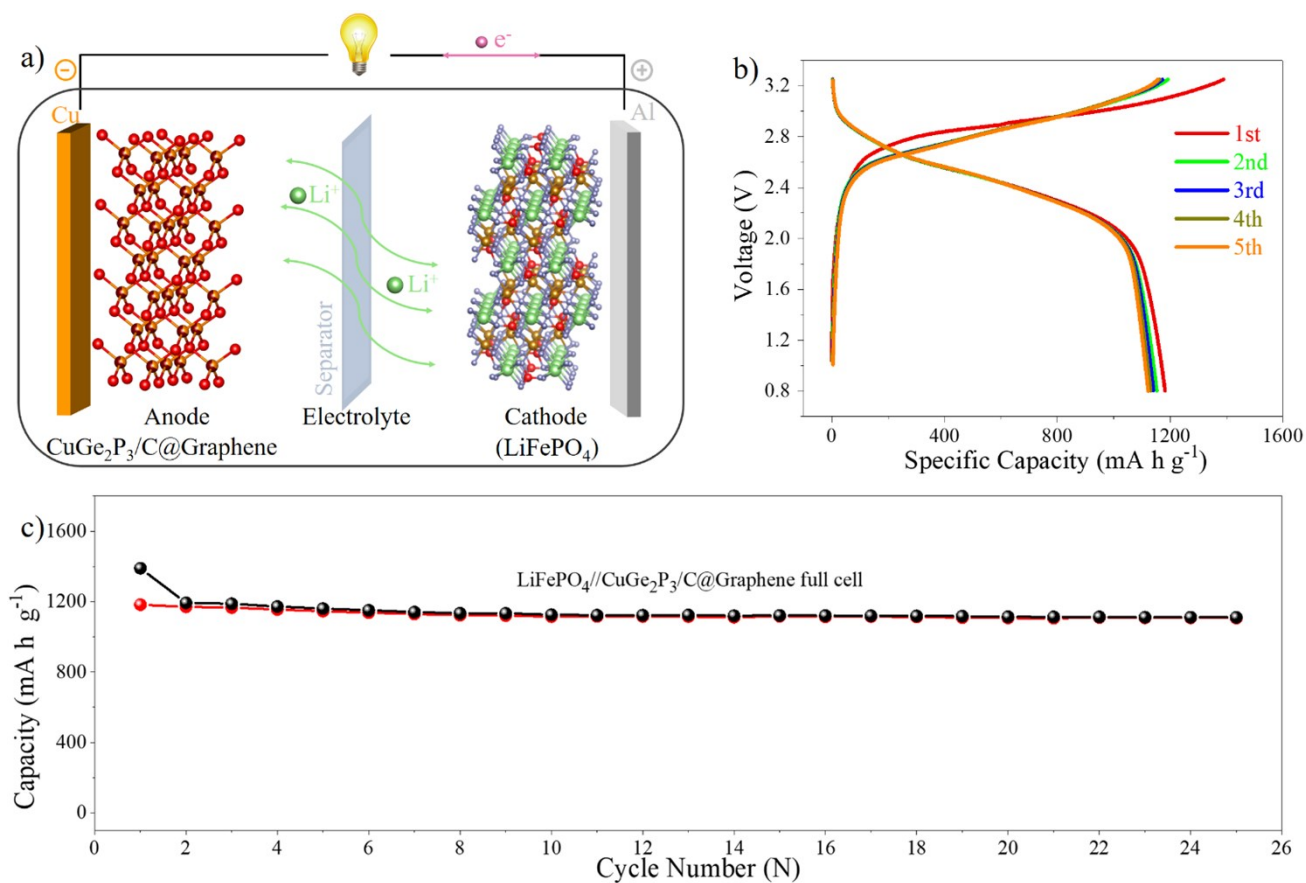

Fig. S25. The LiFePO<sub>4</sub>//CuGe<sub>2</sub>P<sub>3</sub>/C@Graphene full cell: a) a schematic sketch of the full cell; b) the first five discharge-charge profiles; c) cycle performance.

**Table S5.** Performances comparisons of CuGe<sub>2</sub>P<sub>3</sub>/C@Graphene with recently reported Ge-based anodes in terms of initial Coulombic efficiency and long cycling stability.

| Materials                                       | Cycle performance                                              | Initial Coulombic efficiency | References |
|-------------------------------------------------|----------------------------------------------------------------|------------------------------|------------|
| CuGe <sub>2</sub> P <sub>3</sub> /C@Graphene    | 0.02 A g <sup>-1</sup> , 600 cycles, 1312 mA h g <sup>-1</sup> | 91%                          | This work  |
| Li <sub>2</sub> GeO <sub>3</sub>                | 0.05 A g <sup>-1</sup> , 300 cycles, 725 mA h g <sup>-1</sup>  | 56%                          | [49]       |
| Ge <sub>0.90</sub> Ga <sub>0.10</sub>           | 0.32 A g <sup>-1</sup> , 150 cycles, 1146 mA h g <sup>-1</sup> | 85%                          | [50]       |
| GeP <sub>3</sub> /C                             | 0.1 A g <sup>-1</sup> , 130 cycles, 1109 mA h g <sup>-1</sup>  | 73.8%                        | [51]       |
| GeSn                                            | 0.2 C, 25 cycles, 1040 mA h g <sup>-1</sup>                    | 83%                          | [52]       |
| Ge <sub>0.85</sub> Te <sub>0.15</sub>           | 1 C, 500 cycles, 1002 mA h g <sup>-1</sup>                     | 70.4%                        | [53]       |
| GeS                                             | 0.16 A g <sup>-1</sup> , 100 cycles, 1150 mA h g <sup>-1</sup> | 78%                          | [54]       |
| 3D-pGe                                          | 1.147 A g <sup>-1</sup> , 250 cycles, 770 mA h g <sup>-1</sup> | 92.3%                        | [55]       |
| Si-Ge hNWs                                      | 1 C, 400 cycles, 300 mA h g <sup>-1</sup>                      | 74.7%                        | [56]       |
| Ge <sub>3</sub> N <sub>4</sub> @C               | 0.69 A g <sup>-1</sup> , 300 cycles, 660 mA h g <sup>-1</sup>  | 78%                          | [57]       |
| NPGeNFs                                         | 3 C, 500 cycles, 678 mA h g <sup>-1</sup>                      | 81.8%                        | [58]       |
| Ge <sub>2</sub> Sb <sub>2</sub> Se <sub>5</sub> | 0.5 C, 100 cycles, 626 mA h g <sup>-1</sup>                    | 68%                          | [59]       |
| Ge-HS/GNs                                       | 0.8 A g <sup>-1</sup> , 500 cycles, 1182 mA h g <sup>-1</sup>  | 83.6%                        | [60]       |
| rGO/Ge/rGO                                      | 1.6 A g <sup>-1</sup> , 500 cycles, 1085 mA h g <sup>-1</sup>  | 69.6%                        | [61]       |
| Ge (ZnRR)                                       | 0.08 A g <sup>-1</sup> , 300 cycles, 1030 mA h g <sup>-1</sup> | 81%                          | [62]       |
| Li <sub>2</sub> TiGeO <sub>5</sub>              | 1 A g <sup>-1</sup> , 600 cycles, 406 mA h g <sup>-1</sup>     | 68%                          | [63]       |
| Ge@MoS <sub>2</sub>                             | 7 A g <sup>-1</sup> , 100 cycles, 594 mA h g <sup>-1</sup>     | 79.6%                        | [64]       |
| Ge-S-C                                          | 0.1 A g <sup>-1</sup> , 100 cycles, 1114 mA h g <sup>-1</sup>  | 77.7%                        | [65]       |
| Fe-GeO <sub>2</sub>                             | 1 A g <sup>-1</sup> , 100 cycles, 1114 mA h g <sup>-1</sup>    | 58.76%                       | [66]       |

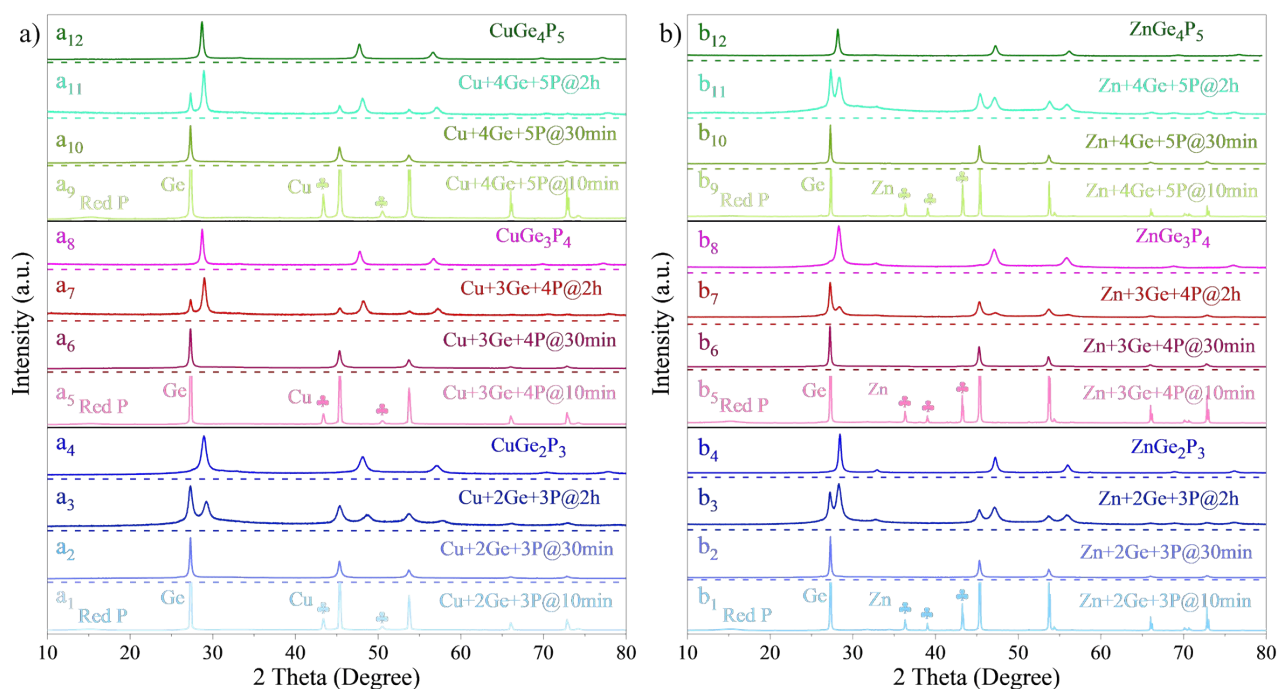

**Fig. S26.** Evolved XRD patterns of the Cu(Zn)-Ge-P samples of Cu(Zn)+2Ge+3P, Cu(Zn)+3Ge+4P, and Cu(Zn)+4Ge+5P samples.

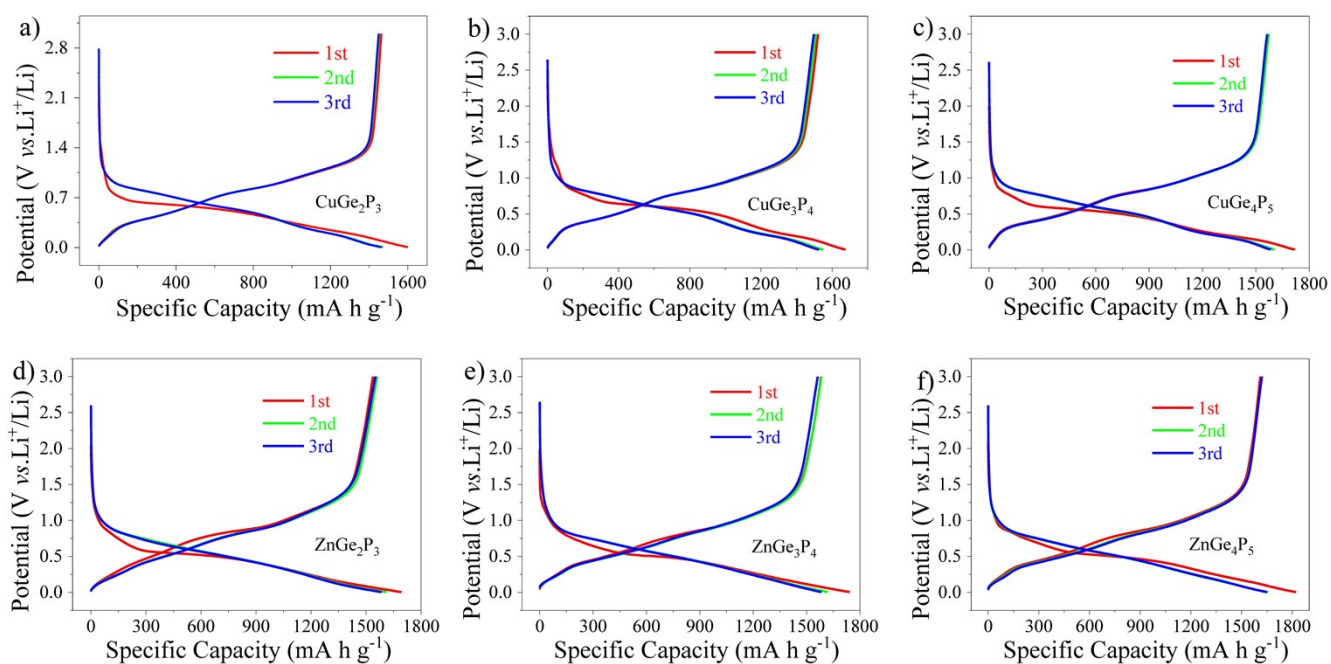

**Fig. S27.** Initial three discharge-charge curves of the cation-disordered Cu(Zn)-Ge-P compounds ( $\text{Cu(Zn)Ge}_2\text{P}_3 \rightarrow \text{Cu(Zn)Ge}_3\text{P}_4 \rightarrow \text{Cu(Zn)Ge}_4\text{P}_5$ ).

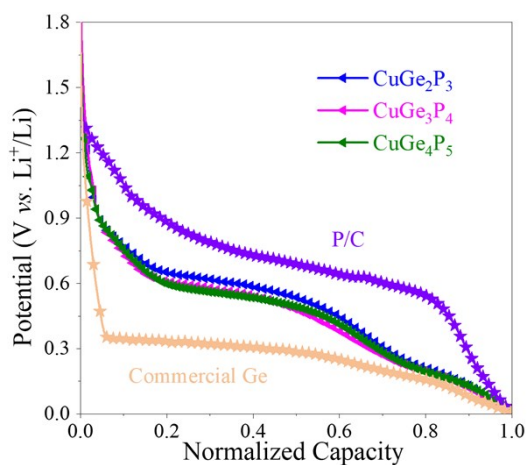

**Fig. S28.** Typical discharge profiles of the cation-disordered Cu-Ge-P compounds ( $\text{CuGe}_2\text{P}_3 \rightarrow \text{CuGe}_3\text{P}_4 \rightarrow \text{CuGe}_4\text{P}_5$ ), commercial Ge and P/C electrodes.
